# Supplementary material for: Systematic and scalable genome-wide essentiality mapping to identify nonessential genes in phages
Source: PLoS Biol. 2023 Dec 4;21(12):e3002416. doi: 10.1371/journal.pbio.3002416 (PMC10695390; doi:10.1371/journal.pbio.3002416)
Supplement: S1 Data — (XLSX) [file pbio.3002416.s009.xlsx]

## Sheet: Fig 3
										Average
	locus_tag	gene	function/Protein name	Well Number	Dilution factor	Plaques	PFU/mL	EOP	Plaque morphology	PFU/mL		Well Number	Dilution factor	Plaques	PFU/mL	EOP	Plaque morphology			EOP1	EOP2	Average	S.D.
				P1-mcp	1e-07	3	15000000000	1		10000000000	20000000	P1-mcp	1e-07	1	5000000000	1			P1-mcp	1	1	1	0
				lambda-mcp		0						lambda-mcp		0					lambda-mcp
B6	lambdap01	nu1	DNA packaging protein	B6	0.1	12	60000	4e-06				B6	0.1	7	35000	7e-06			B6	4e-06	7e-06	5.5e-06	2.12132e-06
B7	lambdap02	A	TerL	B7	0.1	5	25000	1.66667e-06				B7	0.1	1	5000	1e-06			B7	1.66667e-06	1e-06	1.33333e-06	4.71405e-07
B8	lambdap03	W	gpW family protein	B8	0.01	6	300000	2e-05				B8	0.01	4	200000	4e-05			B8	2e-05	4e-05	3e-05	1.41421e-05
B9	lambdap04	B	portal	B9	0.01	3	150000	1e-05				B9	0.01	4	200000	4e-05	small pllaques		B9	1e-05	4e-05	2.5e-05	2.12132e-05
B10	lambdap05	C	S49 family peptidase/capsid component; Viral protease	B10								B10		0					B10			<2E-7
B11	lambdap06	nu3	scaffolding protein	B11		0						B11		0					B11			<2E-7
B12	lambdap07	D	head decoration protein	B12	0.01	2	100000	6.66667e-06				B12	0.1	7	35000	7e-06			B12	6.66667e-06	7e-06	6.83333e-06	2.35702e-07
C1	lambdap08	E	major capsid protein	C1		0						C1	0.1	1	5000	1e-06			C1			-
C2	lambdap09	Fi	DNA packaging protein FI	C2	0.01	6	300000	2e-05				C2	0.01	2	100000	2e-05			C2	2e-05	2e-05	2e-05	0
C3	lambdap10	Fii	head-tail joining protein	C3		0						C3		0					C3			<2E-7
C4	lambdap11	Z	tail protein	C4	0.01	6	300000	2e-05	smaller plaques			C4	0.01	3	150000	3e-05	smaller plaques		C4	2e-05	3e-05	2.5e-05	7.07107e-06
C5	lambdap12	U	tail protein	C5	0.01	6	300000	2e-05				C5	0.01	5	250000	5e-05			C5	2e-05	5e-05	3.5e-05	2.12132e-05
C6	lambdap13	V	tail protein	C6	0.01	1	50000	3.33333e-06				C6	0.01	3	150000	3e-05			C6	3.33333e-06	3e-05	1.66667e-05	1.88562e-05
C7	lambdap14	G	minor tail protein G	C7		0						C7	0.1	1	5000	1e-06			C7		1e-06
C8	lambdap15	T	tail assembly protein T	C8	0.01	1	50000	3.33333e-06				C8	0.01	2	100000	2e-05	small plauqes		C8	3.33333e-06	2e-05	1.16667e-05	1.17851e-05
C9	lambdap16	H	tail tape measure protein	C9	0.1	1	5000	3.33333e-07				C9		0			slight clearance at 1E-1		C9	3.33333e-07
C10	lambdap17	M	tail protein	C10		0						C10		0					C10			<2E-7
C11	lambdap18	L	minor tail protein L	C11		0						C11		0					C11			<2E-7
C12	lambdap19	K	tail protein	C12	0.001	1	500000	3.33333e-05				C12	1e-05	1	5e+07	0.01			C12	3.33333e-05	0.01	0.00501667	0.0070475
				Well Number	Plaques	Dilution factor	PFU/mL	EOP	Plaque morphology			Well Number	Plaques	Dilution factor	PFU/mL	EOP	Plaque morphology			EOP1	EOP2	Average	S.D.
				P1-mcp	4	1e-06	2000000000	1		1500000000	3000000	P1-mcp	2	1e-06	1000000000	1			P1-mcp	1	1	1	0
				lambda-mcp	0							lambda-mcp				0			lambda-mcp
D1	lambdap20	I	tail component	D1	3	0.1	15000	7.5e-06				D1	9	0.1	45000	4.5e-05			D1	7.5e-06	4.5e-05	2.625e-05	2.65165e-05
D2	lambdap21	J	host specificity protein J	D2	1	0.1	5000	2.5e-06				D2	4	0.1	20000	2e-05			D2	2.5e-06	2e-05	1.125e-05	1.23744e-05
D3	lambdap26	lom	Outer membrane beta-barrel protein Lom	D3	5	1e-06	2500000000	1.25	smaller plaques			D3	1	1e-06	500000000	0.5	plaques very small		D3	1.25	0.5	0.875	0.53033
D4	lambdap27	orf-401	protail fiber N-terminal domain containing protein	D4	4	1e-06	2000000000	1				D4	1	1e-07	5000000000	5	plaques slightly smaller		D4	1	5	3	2.82843
D5	lambdap90	orf206b	hypothetical protein; deleted in genome map because there is another gene in the + strand	D5	2	1e-07	10000000000	5				D5	7	1e-06	3500000000	3.5			D5	5	3.5	4.25	1.06066
D6	lambdap28	orf-314	tail fiber protein	D6	1	1e-07	5000000000	2.5				D6	2	1e-07	10000000000	10			D6	2.5	10	6.25	5.3033
D7	lambdap29	orf-194	tail fiber assembly protein	D7	1	1e-07	5000000000	2.5				D7	8	1e-06	4000000000	4			D7	2.5	4	3.25	1.06066
D8	lambdap80	ea47		D8	4	1e-06	2000000000	1				D8	2	1e-07	10000000000	10			D8	1	10	5.5	6.36396
D9	lambdap81	ea31		D9	8	1e-06	4000000000	2				D9	spots ran together -> need to redo		#VALUE!				D9	2	0.384615	1.19231	1.14225
D10	lambdap82	ea59	ATP-dependent endonuclease	D10	5	1e-06	2500000000	1.25				D10	5	1e-07	25000000000	25			D10	1.25	25	13.125	16.7938
D11	lambdap32	mRNA int	spans after ~4th codon of xis to some bases downstream of int	D11	2	1e-07	10000000000	5				D11	5	1e-06	2500000000	2.5			D11	5	2.5	3.75	1.76777
D12	lambdap33	int	tyrosine-type recombinase/integrase	D12	2	1e-06	1000000000	0.5				D12	1	1e-07	5000000000	5			D12	0.5	5	2.75	3.18198
				Well Number	Plaques	Dilution factor	PFU/mL	EOP	Plaque morphology			Well Number	Plaques	Dilution factor	PFU/mL	EOP	Plaque morphology			EOP1	EOP2	Average	S.D.
				P1-mcp	26	1e-05	1300000000	1		3150000000	6300000	P1-mcp	1	1e-07	5000000000	1			P1-mcp	1	1
				lambda-mcp	3	0.1	15000	1.15385e-05	one random plaque at 1E-4			lambda-mcp	2	0.1	10000	2e-06			lambda-mcp
E1	lambdap34	xis	excisionase	E1	6	1e-06	3000000000	2.30769				E1	8	1e-06	4000000000	0.8			E1	2.30769	0.8	1.55385	1.0661
E2	lambdap36	ea8.5		E2	6	1e-06	3000000000	2.30769				E2	5	1e-06	2500000000	0.5			E2	2.30769	0.5	1.40385	1.27823
E3	lambdap83	ea22	ead/Ea22-like family protein	E3	1	1e-07	5000000000	3.84615				E3	6	1e-06	3000000000	0.6			E3	3.84615	0.6	2.22308	2.29538
E4	lambdap37	orf61	hypothetical protein	E4	4	1e-06	2000000000	1.53846				E4	4	1e-06	2000000000	0.4			E4	1.53846	0.4	0.969231	0.805014
E5	lambdap38	orf63	DUF1382 family protein	E5	4	1e-06	2000000000	1.53846				E5	1	1e-07	5000000000	1			E5	1.53846	1	1.26923	0.38075
E6	lambdap39	orf60a	DUF1317 domin-containing protein	E6	1	1e-07	5000000000	3.84615				E6	1	1e-07	5000000000	1			E6	3.84615	1	2.42308	2.01253
E7	lambdap40	mRNA-pl	spans multiple genes from N to exo	E7	1	1e-07	5000000000	3.84615				E7	2	1e-06	1000000000	0.2			E7	3.84615	0.2	2.02308	2.57822
E8	lambdap41	exo	YqaJ viral recombinase family protein	E8	1	1e-06	500000000	0.384615				E8	1	1e-07	5000000000	1			E8	0.384615	1	0.692308	0.435143
E9	lambdap84	bet	recombination protein Bet	E9	1	1e-07	5000000000	3.84615				E9	3	1e-06	1500000000	0.3			E9	3.84615	0.3	2.07308	2.50751
E10	lambdap42	gam	host-nuclease inhibitor protein Gam	E10	6	1e-06	3000000000	2.30769				E10	4	1e-06	2000000000	0.4			E10	2.30769	0.4	1.35385	1.34894
E11	lambdap43	mRNA-pl	spans from N to kil	E11	3	1e-06	1500000000	1.15385				E11	3	1e-06	1500000000	0.3			E11	1.15385	0.3	0.726923	0.60376
E12	lambdap44	mRNA-pl	spans from N to kil	E12	3	1e-06	1500000000	1.15385				E12	2	1e-06	1000000000	0.2			E12	1.15385	0.2	0.676923	0.674471
				D9	1	1e-06	500000000	0.384615											D9	0.384615
				Well Number	Plaques	Dilution factor	PFU/mL	EOP	Plaque morphology			Well Number	Plaques	Dilution factor	PFU/mL	EOP	Plaque morphology			EOP1	EOP2
				P1-mcp	3	1e-06	1500000000	1		3250000000	6500000	P1-mcp	1	1e-07	5000000000	1			P1-mcp	1	1
				lambda-mcp	0							lambda-mcp	1	0.1	5000	1e-06			lambda-mcp
F1	lambdap85	kil	host cell division inhibitory peptide Kil	F1	3	1e-06	1500000000	1				F1	1	1e-07	5000000000	1			F1	1	1	1	0
F2	lambdap86	cIII	protease FtsH-inhibitory lysogeny factor CIII	F2	4	1e-06	2000000000	1.33333				F2	9	1e-06	4500000000	0.9			F2	1.33333	0.9	1.11667	0.306413
F3	lambdap45	ea10	DUF2528 family protein	F3	4	1e-06	2000000000	1.33333				F3	2	1e-07	10000000000	2			F3	1.33333	2	1.66667	0.471405
F4	lambdap46	ral	Restriction inhibitor protein ral	F4	10	0.01	500000	0.000333333	plaques smaller			F4	8	0.01	400000	8e-05	Plaques smaller and more turbid		F4	0.000333333	8e-05	0.000206667	0.000179134
F5	lambdap47	orf28	hypothetical protein	F5	5	1e-06	2500000000	1.66667				F5	1	1e-07	5000000000	1			F5	1.66667	1	1.33333	0.471405
F6	lambdap48	sieB	Superinfection exclusion protein B	F6	6	1e-06	3000000000	2				F6	1	1e-07	5000000000	1			F6	2	1	1.5	0.707107
F7	lambdap49	N	antitermination protein N	F7	8	0.01	400000	0.000266667	plaques smaller			F7	9	0.01	450000	9e-05	Plaques smaller and more turbid		F7	0.000266667	9e-05	0.000178333	0.000124922
F8	lambdap50	mRNA-pre	spans cro to rexB	F8	2	1e-06	1000000000	0.666667				F8	5	1e-06	2500000000	0.5			F8	0.666667	0.5	0.583333	0.117851
F9	lambdap51	mRNA-prm	spans cI to rexB	F9	4	1e-06	2000000000	1.33333				F9	7	1e-06	3500000000	0.7			F9	1.33333	0.7	1.01667	0.447834
F10	lambdap52	mRNA-plit	spans rexB from second codon to some bases after stop codon	F10	3	1e-06	1500000000	1				F10	2	1e-07	10000000000	2			F10	1	2	1.5	0.707107
F11	lambdap53	rexB		F11	7	1e-06	3500000000	2.33333				F11	5	1e-06	2500000000	0.5			F11	2.33333	0.5	1.41667	1.29636
F12	lambdap87	rexA		F12	2	1e-07	10000000000	6.66667				F12	1	1e-07	5000000000	1			F12	6.66667	1	3.83333	4.00694
				Well Number	Plaques	Dilution factor	PFU/mL	EOP	Plaque morphology			Well Number	Plaques	Dilution factor	PFU/mL	EOP	Plaque morphology			EOP1	EOP2
				P1-mcp	5	1e-06	2500000000	1		3750000000	7500000	P1-mcp	1	1e-07	5000000000	1			P1-mcp	1	1
				lambda-mcp	2	0.1	10000	4e-06				lambda-mcp	1	0.1	5000	1e-06			lambda-mcp
G1	lambdap88	cI	LexA family transcriptional regulator	G1	3	1e-06	1500000000	0.6				G1	1	1e-08	50000000000	10			G1	0.6	10	5.3	6.6468
G2	lambdap54	mRNA-pr	spans cro to ren	G2	1	0.01	50000	2e-05				G2	0			<7.5E-6	slight clearance at 1E-1		G2	2e-05		long mRNA transcript
G3	lambdap55	mRNA-pr	spans cro and some bases downstream	G3	0			<5E-6	slight clearance at 1 E-1			G3	0			<7.5E-6	slight clearance at 1E-1		G3			essential
G4	lambdap56	mRNA-pr	spans cro and some bases downstream	G4	0			<5E-6	slight clearance at 1 E-1			G4	0			<7.5E-6	slight clearance at 1E-1		G4			essential
G5	lambdap57	cro		G5	0			<5E-6	slight clearance at 1 E-1			G5	0			<7.5E-6	slight clearance at 1E-1		G5			essential
G6	lambdap58	mRNA-pr	spans few bases upstream of cro to mid-cro	G6	0			<5E-6	slight clearance at 1 E-1			G6	0			<7.5E-6			G6			essential
G7	lambdap60	mRNA-oop transcription mRNA	spans 3' region of cII and few bases downstream	G7	6	1e-06	3000000000	1.2				G7	1	1e-07	5000000000	1			G7	1.2	1	1.1	0.141421
G8	lambdap89	O	replication protein	G8	0			<5E-6	slight clearance at 1 E-1			G8	0			<7.5E-6	slight clearance at 1E-1		G8			essential
G9	lambdap61	P	DNA replication protein	G9	0			<5E-6	slight clearance at 1 E-1			G9	0			<7.5E-6	slight clearance at 1E-1		G9			essential
G10	lambdap62	ren	protein ren	G10	1			<5E-6	slight clearance at 1 E-1			G10	1	0.01	50000	1e-05			G10		1e-05
G11	lambdap63	NinB	recombination protein NinB	G11	4	0.001	2000000	0.0008	tiny tiny plaques			G11	3	0.01	150000	3e-05			G11	0.0008	3e-05	0.000415	0.000544472
G12	lambdap64	NinC	phosphoadenosine phosphosulfate reductase family protein	G12	2	0.01	100000	4e-05	slight clearance at 1 E-1			G12	4	0.1	20000	4e-06			G12	4e-05	4e-06	2.2e-05	2.54558e-05
				Well Number	Plaques	Dilution factor	PFU/mL	EOP	Plaque morphology			Well Number	Plaques	Dilution factor	PFU/mL	EOP	Plaque morphology			EOP1	EOP2	Average	S.D.
				P1-mcp	1	1e-07	5000000000	1		4250000000	8500000	P1-mcp	7	1e-06	3500000000	1			P1-mcp	1	1
				lambda-mcp	3	0.1	15000	3e-06				lambda-mcp	3	0.1	15000	4.28571e-06			lambda-mcp
H1	lambdap67	NinF		H1	2	0.01	100000	2e-05				H1	1	0.01	50000	1.42857e-05			H1	2e-05	1.42857e-05	1.71429e-05	4.04061e-06
H2	lambdap68	NinG	recombination protein NinG	H2	3	0.001	1500000	0.0003	some small plaques some normal			H2	1	0.001	500000	0.000142857			H2	0.0003	0.000142857	0.000221429	0.000111117
H3	lambdap70	NinI	serine/threonine phosphatase	H3	9	0.1	45000	9e-06				H3	12	0.1	60000	1.71429e-05			H3	9e-06	1.71429e-05	1.30714e-05	5.75787e-06
H4	lambdap71	Q	antitermination protein	H4	2	0.01	100000	2e-05	slight learance at 1E-1, some small plaques some regular			H4	8	0.1	40000	1.14286e-05			H4	2e-05	1.14286e-05	1.57143e-05	6.06092e-06
H5	lambdap73	orf-64	hypothetical protein	H5	7	1e-06	3500000000	0.7				H5	4	1e-06	2000000000	0.571429			H5	0.7	0.571429	0.635714	0.0909137
H6	lambdap74	S	holin/anti-holin	H6	2	0.01	100000	2e-05				H6	6	0.01	300000	8.57143e-05	plaques tiny and turbid		H6	2e-05	8.57143e-05	5.28571e-05	4.6467e-05
H7	lambdap92	S'	holin/anti-holin	H7	4	0.001	2000000	0.0004	plaques very small very turbid			H7	11	0.01	550000	0.000157143	plaques tiny and turbid		H7	0.0004	0.000157143	0.000278571	0.000171726
H8	lambdap75	R	endolysin	H8	5	1e-06	2500000000	0.5				H8	4	1e-06	2000000000	0.571429	smallish plaques		H8	0.5	0.571429	0.535714	0.0505076
H9	lambdap76	Rz		H9	3	1e-06	1500000000	0.3	plaques very small very turbid			H9	6	1e-05	300000000	0.0857143	small plaques		H9	0.3	0.0857143	0.192857	0.151523
H10	lambdap77	bor	serum resistance lipoprotein Bor	H10	1	1e-07	5000000000	1				H10	4	1e-06	2000000000	0.571429			H10	1	0.571429	0.785714	0.303046
H11	lambdap78		putative envelope protein	H11	1	1e-07	5000000000	1				H11	2	1e-07	10000000000	2.85714			H11	1	2.85714	1.92857	1.3132
H12	lambdap79		hypothetical protein	H12	13	0.01	650000	0.00013				H12	2	0.001	1000000	0.000285714			H12	0.00013	0.000285714	0.000207857	0.000110107

## Sheet: Fig 4
Well Number	locus_tag	gene	function	Well Number	Volume plated	Dilution factor	plaques	PFU/mL	EOP	plaque morphology			Well Number	Volume plated	Dilution factor	plaques	PFU/mL	EOP	plaque morphology		EOP1	EOP2	Average	S.D.
				P1 mcp	2	0.1	-	no plaques, just clearing				2020-08-07	P1 mcp	2	0.1	-	no plaques, just clearing
				lambda mcp	2	1e-06	4	2000000000	1		1700000000		lambda mcp	2	1e-06	5	2500000000	1			1	1	1	0
A1	P1_gp002	cra	cre associated function	A1	2	1e-06	3	1500000000	0.75	smaller plaque	3400000		A1	2	1e-05	28	1400000000	0.56	smaller plaque		0.75	0.56	0.655	0.13435
A2	P1_gp003	cre	cyclization recombinase	A2	2	1e-06	7	3500000000	1.75	smaller plaque			A2	2	1e-06	3	1500000000	0.6	smaller plaque		1.75	0.6	1.175	0.813173
A3	P1_gp004	c8	establishment of lysogeny	A3	2	1e-06	7	3500000000	1.75	smaller plaque			A3	2	1e-06	6	3000000000	1.2	smaller plaque		1.75	1.2	1.475	0.388909
A4	P1_gp005	ref	recombination enhancement	A4	2	1e-06	6	3000000000	1.5				A4	2	1e-06	5	2500000000	1			1.5	1	1.25	0.353553
A5	P1_gp006	mat	maturation control	A5	2	1e-05	11	550000000	0.275	tiny plaque			A5	2	1e-05	14	700000000	0.28	tiny plaque		0.275	0.28	0.2775	0.00353553
A6	P1_gp007	res	restriction component	A6	2	1e-06	5	2500000000	1.25				A6	2	1e-06	6	3000000000	1.2			1.25	1.2	1.225	0.0353553
A7	P1_gp008	mod	modification component	A7	2	1e-06	5	2500000000	1.25				A7	2	1e-06	4	2000000000	0.8			1.25	0.8	1.025	0.318198
A8	P1_gp009	lxc	modulator of C1 action; enhances binding of C1 to all its operators; lowers expression of C1	A8	2	1e-06	4	2000000000	1				A8	2	1e-06	2	1000000000	0.4			1	0.4	0.7	0.424264
A9	P1_gp010	ulx	enhances incorporation of darB	A9	2	1e-06	3	1500000000	0.75				A9	2	1e-05	26	1300000000	0.52			0.75	0.52	0.635	0.162635
A10	P1_gp011	darB	antirestriction	A10	2	1e-06	3	1500000000	0.75				A10	2	1e-06	2	1000000000	0.4			0.75	0.4	0.575	0.247487
A11	P1_gp012	prt	portal	A11	2	0.1	-	no plaques, just clearing					A11	2	0.1	-	no plaques, just clearing						<3.4E-6
A12	P1_gp013	pro	head processing	A12	2	0.1	-	no plaques, just clearing					A12	2	0.1	-	no plaques, just clearing						<3.4E-6
				Well Number	Volume plated	Dilution factor	plaques	PFU/mL	EOP	plaque morphology			Well Number	Volume plated	Dilution factor	plaques	PFU/mL	EOP	plaque morphology		EOP1	EOP2	Average	S.D.
				P1 mcp	2	0.1	-	no plaques, just clearing					P1 mcp	2	0.1	-	no plaques, just clearing
				lambda mcp	2	1e-05	25	2500000000	1		1675000000		lambda mcp	2	1e-05	17	8.5e+08	1			1	1	1	0
B1	P1_gp115	lydE	putative antiholin	B1	2	1e-06	4	4000000000	1.6		3350000		B1	2	1e-05	6	300000000	0.352941			1.6	0.352941	0.976471	0.881804
B2	P1_gp014	lydD	putative holin	B2	2	1e-06	3	3000000000	1.2				B2	2	1e-05	18	9e+08	1.05882			1.2	1.05882	1.12941	0.0998268
B3	P1_gp015	lyz	lysozyme	B3	2	0.0001	12	120000000	0.048	tiny plaques			B3	2	0.0001	9	45000000	0.0529412	tiny plaques		0.048	0.0529412	0.0504706	0.00349394
B4	P1_gp016	ssb	single stranded DNA binding protein	B4	2	1e-05	14	1400000000	0.56				B4	2	1e-05	10	5e+08	0.588235			0.56	0.588235	0.574118	0.0199654
B5	P1_gp017	isaA	IS1 insertion-associated gene	B5	2	1e-06	3	3000000000	1.2				B5	2	1e-05	9	4.5e+08	0.529412			1.2	0.529412	0.864706	0.474177
B6	P1_gp018	insB	IS1 transposition protein	B6	2	1e-05	17	1.7e+09	0.68				B6	2	1e-05	11	550000000	0.647059			0.68	0.647059	0.663529	0.0232929
B7	P1_gp019	insA	IS1 transposition protein	B7	2	1e-06	3	3000000000	1.2				B7	2	1e-05	15	7.5e+08	0.882353			1.2	0.882353	1.04118	0.22461
B8	P1_gp020	isaB	IS1 insertion-associated gene	B8	2	1e-06	4	4000000000	1.6				B8	2	1e-05	22	1100000000	1.29412			1.6	1.29412	1.44706	0.216291
B9	P1_gp021	hxr	possible repressor; homolog of Xre	B9	2	1e-06	6	6000000000	2.4				B9	2	1e-05	12	600000000	0.705882			2.4	0.705882	1.55294	1.19792
B10	P1_gp022	ddrB	antirestriction	B10	2	1e-05	19	1.9e+09	0.76				B10	2	1e-05	16	8e+08	0.941176			0.76	0.941176	0.850588	0.128111
B11	P1_gp116	iddB	internal to ddrB	B11	2	1e-05	18	1.8e+09	0.72				B11	2	1e-05	6	300000000	0.352941			0.72	0.352941	0.536471	0.25955
B12	P1_gp023	ddrA	antirestriction	B12	2	1e-06	3	3000000000	1.2				B12	2	1e-05	13	650000000	0.764706			1.2	0.764706	0.982353	0.307799
				Well Number	Volume plated	Dilution factor	plaques	PFU/mL	EOP	plaque morphology		2020-08-22	Well Number	Volume plated	Dilution factor	plaques	PFU/mL	EOP	plaque morphology		EOP1	EOP2	Average	S.D.
				P1 mcp	2	0.1	-	no plaques, just clearing					P1 mcp	2	0.1	-	no plaques, just clearing
				lambda mcp	2	1e-05	7	350000000	1		260000000		lambda mcp	2	0.0001	34	170000000	1			1	1	1
C1	P1_gp024	darA	antirestriction	C1	2	1e-05	6	300000000	0.857143	tiny	520000		C1	2	0.0001	15	75000000	0.441176	tiny		0.857143	0.441176	0.64916	0.294133
C2	P1_gp025	hdf	antirestriction	C2	2	1e-05	4	2e+08	0.571429	tiny			C2	2	1e-05	6	300000000	1.76471	tiny		0.571429	1.76471	1.16807	0.843774
C3	P1_gp026	lydB	lysis determinant; prevents premature lysis	C3	2	0.001	3	1500000	0.00428571	tiny			C3	2	0.001	14	7000000	0.0411765	tiny		0.00428571	0.0411765	0.0227311	0.0260857
C4	P1_gp027	lydA	holin	C4	2	0.0001	8	40000000	0.114286	tiny			C4	2	0.0001	4	20000000	0.117647	tiny		0.114286	0.117647	0.115966	0.00237683
C5	P1_gp028	lydC	holin	C5	2	1e-05	7	350000000	1				C5	2	1e-05	4	2e+08	1.17647			1	1.17647	1.08824	0.124784
C6	P1_gp029	cin	site-specific recombinase involved in C-segment inversion	C6	2	1e-05	5	2.5e+08	0.714286				C6	2	1e-05	7	350000000	2.05882			0.714286	2.05882	1.38655	0.950732
C7	P1_gp001	Sv prime	C-terminal moiety of tail fiber gpS	C7	2	essential							C7	2	essential								<5.2E-5
C8	P1_gp030	U prime	structural protein gpU prime of tail fiber	C8	2	1e-05	10	5e+08	1.42857				C8	2	1e-05	1	5e+07	0.294118			1.42857	0.294118	0.861345	0.80218
C9	P1_gp031	U		C9	2	essential							C9	2	essential								<5.2E-5
C10	P1_gp032	S		C10	2	essential							C10	2	essential								<5.2E-5
C11	P1_gp033	R	tail fiber structure or assembly	C11	2	essential							C11	2	essential								<5.2E-5
C12	P1_gp034	16	baseplate or tail tube	C12	2	essential							C12	2	essential								<5.2E-5
				Well Number	Volume plated	Dilution factor	plaques	PFU/mL	EOP	plaque morphology		2020-08-29	Well Number	Volume plated	Dilution factor	plaques	PFU/mL	EOP	plaque morphology		EOP1	EOP2	Average	S.D.
				P1 mcp	2	0.1	-	no plaques, just clearing					P1 mcp	2	0.1	-	no plaques, just clearing
				lambda mcp	2	1e-05	4	2e+08	1		145000000		lambda mcp	2	0.0001	18	90000000	1			1	1	1	1.11022e-16
D1	P1_gp035	bplA	baseplate structure, may correspond to gene 3	D1	2	essential					290000		D1	2	essential								<2.9E-5
D2	P1_gp036	pmgA		D2	2	essential							D2	2	essential								<2.9E-5
D3	P1_gp037	sit	tapemeasure	D3	2	essential							D3	2	essential								<2.9E-5
D4	P1_gp038	pmgB		D4	2	essential							D4	2	essential								<2.9E-5
D5	P1_gp039	tub	tail tube	D5	2	essential							D5	2	essential								<2.9E-5
D6	P1_gp040	pmgC		D6	2	essential							D6	2	essential								<2.9E-5
D7	P1_gp041	simC	superimmunity	D7	2	1e-05	5	2.5e+08	1.25				D7	2	1e-05	4	2e+08	2.22222			1.25	2.22222	1.73611	0.687465
D8	P1_gp042	simB	superimmunity	D8	2	1e-05	13	650000000	3.25				D8	2	1e-05	8	4e+08	4.44444			3.25	4.44444	3.84722	0.8446
D9	P1_gp043	simA	superimmunity	D9	2	1e-05	5	2.5e+08	1.25				D9	2	1e-05	1	5e+07	0.555556			1.25	0.555556	0.902778	0.491046
D10	P1_gr044	c4 RNA	acts on icd and ant mRNA	D10	2	1e-05	6	300000000	1.5	small plaque			D10	2	0.0001	3	15000000	0.166667	small plaque		1.5	0.166667	0.833333	0.942809
D11	P1_gp045	icd	reversible inhibition of cell division	D11	2	1e-05	3	150000000	0.75	small plaque			D11	2	0.0001	8	40000000	0.444444	small plaque		0.75	0.444444	0.597222	0.21606
D12	P1_gp046	anti1	antagonizes C1 represssion by forming a complex of Ant1/Ant2/C1	D12	2	1e-05	5	2.5e+08	1.25				D12	2	1e-05	5	2.5e+08	2.77778			1.25	2.77778	2.01389	1.0803
				Well Number	Volume plated	Dilution factor	plaques	PFU/mL	EOP	plaque morphology		2020-10-18	Well Number	Volume plated	Dilution factor	plaques	PFU/mL	EOP	plaque morphology		EOP1	EOP2	Average	S.D.
				P1 mcp	2	0.1	-	no plaques, just clearing					P1 mcp	2	0.1	-	no plaques, just clearing
				lambda mcp	2	1e-06	10	5000000000	1		6000000000		lambda mcp	2	1e-06	14	7000000000	1			1	1	1	0
E1	P1_gp047	ant2	product antagonizes C1 repression by formation of Ant1/Ant2/C1 complex	E1	2	1e-06	10	5000000000	1		12000000		E1	2	1e-07	5	25000000000	3.57143			1	3.57143	2.28571	1.81827
E2	P1_gp048	ask	RNA antisense to 5' region and regulatory region of kilA gene; corresponds to former P53as RNA; negatively regulates lytic replication	E2	2	1e-06	8	4000000000	0.8				E2	2	1e-06	21	10500000000	1.5			0.8	1.5	1.15	0.494975
E3	P1_gp049	kilA	product can kill host	E3	2	1e-06	3	1500000000	0.3	tiny plaque			E3	2	1e-07	2	10000000000	1.42857	tiny plaque		0.3	1.42857	0.864286	0.798021
E4	P1_gp050	repL	initiates replication at oriL	E4	2	1e-06	5	2500000000	0.5				E4	2	1e-06	13	6500000000	0.928571			0.5	0.928571	0.714286	0.303046
E5	P1_gp051	rlfA	possibly associated with lytic replication	E5	2	1e-06	13	6500000000	1.3				E5	2	1e-06	17	8500000000	1.21429			1.3	1.21429	1.25714	0.0606092
E6	P1_gp052	rlfB	possibly associated with lytic replication	E6	2	1e-06	9	4500000000	0.9				E6	2	1e-06	12	6000000000	0.857143			0.9	0.857143	0.878571	0.0303046
E7	P1_gp053	pmgF	putative morphogenetic function	E7	2	1e-06	12	6000000000	1.2				E7	2	1e-06	17	8500000000	1.21429			1.2	1.21429	1.20714	0.0101015
E8	P1_gp054	bplB	baseplate structure	E8	2	essential							E8	2	essential								<1.2E-7
E9	P1_gp055	pmgG	putative morphogenetic function	E9	2	essential							E9	2	essential								<1.2E-7
E10	P1_gp056	21	baseplate or tail tube	E10	2	essential							E10	2	essential								<1.2E-7
E11	P1_gp057	22	tail sheath	E11	2	essential							E11	2	essential								<1.2E-7
E12	P1_gp058	23	mcp	E12	2	essential							E12	2	essential								<1.2E-7
				Well Number	Volume plated	Dilution factor	plaques	PFU/mL	EOP	plaque morphology		2020-10-31	Well Number	Volume plated	Dilution factor	plaques	PFU/mL	EOP	plaque morphology		EOP1	EOP2	Average	S.D.
				P1 mcp	2	0.1	-	no plaques, just clearing					P1 mcp	2	0.1	-	no plaques, just clearing
				lambda mcp	2	1e-06	22	11000000000	1		6750000000		lambda mcp	2	1e-06	5	2500000000	1			1	1	1	0
F1	P1_gp059	parB	active partitioning of P1 plasmid during cell division	F1	2	1e-06	16	8000000000	0.727273		13500000		F1	2	1e-06	9	4500000000	1.8			0.727273	1.8	1.26364	0.758533
F2	P1_gp060	parA	active partitioning of P1 plasmid during cell division	F2	2	1e-06	12	6000000000	0.545455				F2	2	1e-06	13	6500000000	2.6			0.545455	2.6	1.57273	1.45278
F3	P1_gp061	repA	initiates replication from oriR; plasmid replication	F3	2	1e-06	20	10000000000	0.909091				F3	2	1e-06	5	2500000000	1			0.909091	1	0.954545	0.0642824
F4	P1_gp062	upfA		F4	2	1e-06	12	6000000000	0.545455				F4	2	1e-06	9	4500000000	1.8			0.545455	1.8	1.17273	0.887098
F5	P1_gp063	mlp	membrane lipoprotein precursor	F5	2	1e-06	6	3000000000	0.272727				F5	2	1e-06	3	1500000000	0.6			0.272727	0.6	0.436364	0.231417
F6	P1_gp064	ppfA	possible periplasmid function	F6	2	1e-06	10	5000000000	0.454545				F6	2	1e-06	11	5500000000	2.2			0.454545	2.2	1.32727	1.23422
F7	P1_gp065	upfB		F7	2	1e-06	12	6000000000	0.545455				F7	2	1e-06	10	5000000000	2			0.545455	2	1.27273	1.02852
F8	P1_gp066	upfC		F8	2	1e-06	14	7000000000	0.636364				F8	2	1e-06	8	4000000000	1.6			0.636364	1.6	1.11818	0.681394
F9	P1_gp067	uhr		F9	2	1e-06	16	8000000000	0.727273				F9	2	1e-06	5	2500000000	1			0.727273	1	0.863636	0.192847
F10	P1_gp068	hrdC	hpothetical recombination associated protein of RdgC family	F10	2	1e-06	12	6000000000	0.545455				F10	2	1e-06	6	3000000000	1.2			0.545455	1.2	0.872727	0.462834
F11	P1_gp069	dmt	DNA methlytransferases; methlysates A at GATC and perhaps also at C5 cytosine in unknown sequences	F11	2	1e-06	12	6000000000	0.545455				F11	2	1e-06	11	5500000000	2.2			0.545455	2.2	1.37273	1.16994
F12	P1_gt071	trnT		F12	2	1e-06	14	7000000000	0.636364				F12	2	1e-06	6	3000000000	1.2			0.636364	1.2	0.918182	0.398551
				Well Number	Volume plated	Dilution factor	plaques	PFU/mL	EOP	plaque morphology			Well Number	Volume plated	Dilution factor	plaques	PFU/mL	EOP	plaque morphology		EOP1	EOP2	Average	S.D.
				P1 mcp	2	0.1	-	no plaques, just clearing					P1 mcp	2	0.1	-	no plaques, just clearing
				lambda mcp	2	1e-06	15	7500000000	1		4075000000		lambda mcp	2	1e-05	13	650000000	1			1	1	1	0
G1	P1_gp072	plp	putative lipoprotein	G1	2	1e-06	15	7500000000	1		8150000		G1	2	1e-05	28	1400000000	2.15385			1	2.15385	1.57692	0.815892
G2	P1_gp073	upl		G2	2	1e-06	22	11000000000	1.46667				G2	2	1e-05	30	1.5e+09	2.30769			1.46667	2.30769	1.88718	0.594695
G3	P1_gp074	tciA	tellurite or colicin resistance or inhibition of cell division	G3	2	1e-06	9	4500000000	0.6				G3	2	1e-05	9	4.5e+08	0.692308	small		0.6	0.692308	0.646154	0.0652714
G4	P1_gp075	tciB	tellurite or colicin resistance or inhibition of cell division	G4	2	1e-06	16	8000000000	1.06667	small plaques			G4	2	1e-05	12	600000000	0.923077	small		1.06667	0.923077	0.994872	0.101533
G5	P1_gp076	tciC	tellurite or colicin resistance or inhibition of cell division	G5	2	1e-06	15	7500000000	1				G5	2	1e-05	21	1050000000	1.61538			1	1.61538	1.30769	0.435143
G6	P1_gt117	trnI		G6	2	1e-06	12	6000000000	0.8				G6	2	1e-05	25	1250000000	1.92308			0.8	1.92308	1.36154	0.794135
G7	P1_gp077	ban	dnaB homolog	G7	2	1e-06	13	6500000000	0.866667				G7	2	1e-05	20	1e+09	1.53846			0.866667	1.53846	1.20256	0.475031
G8	P1_gp078	dbn	downstream of ban	G8	2	1e-06	18	9000000000	1.2				G8	2	1e-05	18	9e+08	1.38462			1.2	1.38462	1.29231	0.130543
G9	P1_gp079	5	baseplate	G9	2	0.0001	3	15000000	0.002	tiny plaques; pin point			G9	2	essential								<2.1E-6
G10	P1_gp080	6	tail length	G10	2	0.0001	11	55000000	0.00733333	tiny plaques; pin point			G10	2	0.001	12	6000000	0.00923077	tiny plaques; pin point		0.00733333	0.00923077	0.00828205	0.00134169
G11	P1_gp081	24	baseplate or tail stability	G11	2	0.001	20	10000000	0.00133333	tiny plaques; pin point			G11	2	0.001	11	5500000	0.00846154	tiny plaques; pin point		0.00133333	0.00846154	0.00489744	0.0050404
G12	P1_gp082	7	tail stability	G12	2	essential							G12	2	essential								<8.2E-6
H1	P1_gp083	25	tail stability	H1	2	1e-05	9	4.5e+08	0.06	tiny plaque; pin point			H1	2	1e-05	2	1e+08	0.153846	tiny plaques; pin point		0.06	0.153846	0.106923	0.0663593
H2	P1_gp084	26	baseplate; some similarity to non-muscle myosin II heavy chain and Pseudomonas aeruginosa TolA	H2	2	1e-05	2	1e+08	0.0133333	tiny plaque; pin point			H2	2	1e-05	3	150000000	0.230769	tiny plaques; pin point		0.0133333	0.230769	0.122051	0.15375
H3	P1_gp085	pmgL		H3	2	1e-06	10	5000000000	0.666667				H3	2	1e-05	26	1300000000	2			0.666667	2	1.33333	0.942809
H4	P1_gp086	pmgM		H4	2	1e-06	8	4000000000	0.533333	tiny plaque; pin point			H4	2	1e-05	3	150000000	0.230769	tiny plaques; pin point		0.533333	0.230769	0.382051	0.213945
H5	P1_gp087	pmgN		H5	2	0.0001	20	100000000	0.0133333	tiny plaque; pin point			H5	2	0.0001	2	10000000	0.0153846	tiny plaques; pin point		0.0133333	0.0153846	0.014359	0.00145048
H6	P1_gp088	pmgO		H6	2	1e-06	7	3500000000	0.466667				H6	2	1e-05	22	1100000000	1.69231	small		0.466667	1.69231	1.07949	0.866659
H7	P1_gp089	pmgP		H7	2	1e-06	10	5000000000	0.666667				H7	2	1e-05	10	5e+08	0.769231			0.666667	0.769231	0.717949	0.0725238
H8	P1_gp090	protein phosphatase		H8	2	1e-06	19	9500000000	1.26667				H8	2	1e-05	15	7.5e+08	1.15385	small		1.26667	1.15385	1.21026	0.0797761
H9	P1_gp091	pmgQ		H9	2	1e-06	13	6500000000	0.866667				H9	2	1e-05	25	1250000000	1.92308			0.866667	1.92308	1.39487	0.746995
H10	P1_gp092	pmgR		H10	2	1e-06	11	5500000000	0.733333	smaller plaque			H10	2	1e-05	15	7.5e+08	1.15385	small		0.733333	1.15385	0.94359	0.297347
H11	P1_gp093	pmgS		H11	2	1e-06	14	7000000000	0.933333				H11	2	1e-05	18	9e+08	1.38462			0.933333	1.38462	1.15897	0.319105
H12	P1_gp094	pap	acid phosphatase	H12	2	1e-06	14	7000000000	0.933333				H12	2							0.933333	0.604651	0.768992	0.232413
				Well Number	Volume plated	Dilution factor	plaques	PFU/mL	EOP	plaque morphology			Well Number	Volume plated	Dilution factor	plaques	PFU/mL	EOP	plaque morphology		EOP1	EOP2	Average	S.D.
				P1-mcp	2	0.1	-	no plaques, just clearing					P1-mcp	2	0.1	-	no plaques, just clearing
				lambda-mcp	2	1e-07	2	10000000000	1		5750000000		lambda-mcp	2	1e-06	3	1500000000	1			1	1	1	0
A1	P1_gp095	pmgT		A1	2	1e-06	6	3000000000	0.3	smaller plaques	11500000		A1	2	1e-06	5	2500000000	1.66667	smaller plaques		0.3	1.66667	0.983333	0.966379
A2	P1_gp096	pmgU		A2	2	1e-07	1	5000000000	0.5	smaller plaques			A2	2	1e-06	10	5000000000	3.33333	smaller plaques		0.5	3.33333	1.91667	2.00347
A3	P1_gp097	pmgV		A3	2	1e-07	1	5000000000	0.5				A3	2	1e-07	1	5000000000	3.33333			0.5	3.33333	1.91667	2.00347
A4	P1_gp099	upfN		A4	2	1e-07	2	10000000000	1				A4	2	1e-06	2	1000000000	0.666667			1	0.666667	0.833333	0.235702
A5	P1_gp100	upfO		A5	2	1e-07	1	5000000000	0.5				A5	2	1e-05	42	2100000000	1.4			0.5	1.4	0.95	0.636396
A6	P1_gp101	hot		A6	2	1e-06	2	1000000000	0.1				A6	2	1e-06	7	3500000000	2.33333			0.1	2.33333	1.21667	1.57921
A7	P1_gp102	lxr		A7	2	1e-06	5	2500000000	0.25				A7	2	1e-06	4	2000000000	1.33333			0.25	1.33333	0.791667	0.766032
A8	P1_gp103	humD		A8	2	1e-05	61	3.05e+09	0.305	smaller plaques			A8	2	1e-05	23	1150000000	0.766667	smaller plaques		0.305	0.766667	0.535833	0.326448
A9	P1_gp104	phd		A9	2	1e-07	1	5000000000	0.5	smaller plaques			A9	2	1e-05	18	9e+08	0.6	smaller plaques		0.5	0.6	0.55	0.0707107
A10	P1_gp105	doc		A10	2	1e-06	7	3500000000	0.35	smaller plaques			A10	2	1e-05	11	550000000	0.366667	smaller plaques		0.35	0.366667	0.358333	0.0117851
A11	P1_gp107	pdcB		A11	2	1e-07	1	5000000000	0.5	makes plaques very hard to see (smaller) and bacterial growth is lighter			A11	2	1e-05	26	1300000000	0.866667	smaller plaques		0.5	0.866667	0.683333	0.259272
A12	P1_gp108	lpa		A12	2	essential							A12	2	essential								<1.2E-7
B1	P1_gp109	pacA		B1	2	essential							B1	2	essential								<1.2E-7
B2	P1_gp110	pacB		B2	2	essential							B2	2	essential								<1.2E-7
B3	P1_gp111	c1		B3	2	1e-07	1	5000000000	0.5				B3	2	1e-06	7	3500000000	2.33333			0.5	2.33333	1.41667	1.29636
B4	P1_gp112	coi		B4	2	1e-06	3	1500000000	0.15				B4	2	1e-06	4	2000000000	1.33333			0.15	1.33333	0.741667	0.836743
B5	P1_gp113	imcB		B5	2	1e-06	6	3000000000	0.3				B5	2	1e-06	4	2000000000	1.33333			0.3	1.33333	0.816667	0.730677

## Sheet: Fig 5b 
dilutions (PFU)	P1 phage	p1 phage	p1 phage	average	std
10000000000	566929	391786	636823	531846	126230
10000000	11121	13147	23626	15964.7	6711.79
100000	1524	1828	4582	2644.67	1684.65

## Sheet: Fig 5c
library	lambda	P1	average Lambda	stdev		P1 average	stdev
P1_lambda_1	13803	3225191	13516.7	474.458		3.17416e+06	251301
P1_lambda_1	13778	3396033
P1_lambda_1	12969	2901264
P1_lambda_2	1695	3747027	1677.67	70.614		3632943	105105
P1_lambda_2	1600	3611759
P1_lambda_2	1738	3540043
P1_lambda_3	75945	1692804	85121	10528.2		1637636	133086
P1_lambda_3	82803	1485837
P1_lambda_3	96615	1734267
				c
