# Supplementary material for: Systematic and scalable genome-wide essentiality mapping to identify nonessential genes in phages
Source: PLoS Biol. 2023 Dec 4;21(12):e3002416. doi: 10.1371/journal.pbio.3002416 (PMC10695390; doi:10.1371/journal.pbio.3002416)
Supplement: S1 Table — (XLSX) [file pbio.3002416.s005.xlsx]

## Sheet: Bacterial strains
Supplementary Table 1. Bacterial strains and phages
	Strain number	Strains	Plasmids		Details	Reference	Link
		BW25113			(K-12 lacI+rrnBT14 Δ(araB–D)567 Δ(rhaD–B)568 ΔlacZ4787(::rrnB-3) hsdR514 rph-1)	Lab stock
		BW25113	DP33	pBAD24	empty cloning vector	1	https://benchling.com/s/seq-huMSHytNbnu4DHJGfOJP
		BW25113	DP50	pBFC0099	vector expressing dCas12a; Used for cloning spacers for CRISPRi assays	Doudna Lab (Brady Cress)	https://benchling.com/s/seq-mZJYPvtUAJB8BXxR9A3v
		BW25113	DP51	pBFC0099_mcp1	CRISPRi plasmid targeting P1 mcp; Used as control for CRISPRi screen	This study	https://benchling.com/s/seq-r8Qwq1kYgWuqGJpuborV
		BW25113	DP52	pBFC0099_mcp2	CRISPRi plasmid repressing P1 mcp;	This study	https://benchling.com/s/seq-pzjrqqFvuQfdGMLMf15a
		BW25113	DP53	pBFC0099_pacA1	CRISPRi plasmid repressing P1 pacA	This study	https://benchling.com/s/seq-H1gfINodHfslEN47PcoG
		BW25113	DP54	pBFC0099_pacA2	CRISPRi plasmid repressing P1 pacA	This study	https://benchling.com/s/seq-AGiybzN2d5tL90mbz9gU
		BW25113	DP55	pBFC0099_sit1	CRISPRi plasmid repressing P1 sit	This study	https://benchling.com/s/seq-fF7AwkOXLcGLku8CnjpA
		BW25113	DP56	pBFC0099_sit2	CRISPRi plasmid repressing P1 sit	This study	https://benchling.com/s/seq-boIgco5u9w9ta6tUZNFa
		BW25113	DP57	pBFC0099_ppp	CRISPRi plasmid repressing P1 ppp	This study	https://benchling.com/s/seq-JIyvyWceVgkozMz79rF0
		BW25113	DP58	pBFC0099_lambda-mcp1	CRISPRi plasmid repressing lambda mcp; Used as control for CRISPRi screen	This study	https://benchling.com/s/seq-39zvVlTvFIp092K6yKUb
		BW25113	DP59	pBFC0099_lambda-nu1	CRISPRi plasmid repressing lambda nu1	This study	https://benchling.com/s/seq-kTb0PX0s4hyuwnhHaZ7C
		BW25113	DP84	pBFC0423	Vector expressing nuclease active Cas12a; Otherwise similar to pBFC0099;	Doudna Lab (Brady Cress)	https://benchling.com/s/seq-1O08LrTclGFrOJ55qu6S
		BW25113	DP87	pBAD24_P1_res_barcode1	To replace P1 res gene with a synthetic DNA segment encoding randomized barcode	This study	https://benchling.com/s/seq-ABGdX46FmMHwwdMjno6s
		BW25113	DP88	pBFC0423_2x-res	Derivative of pBFC0423 expressing two gRNA's targeting P1 res gene	This study	https://benchling.com/s/seq-SyzvcGEfjnQQt5O8MMIM
		BW25113	DP89	pBAD24_cra_darB	To replace P1 genome encompassing cra-darB region with a synthetic DNA segment encoding randomized barcode	This study	https://benchling.com/s/seq-0PmiksRYv3rfn9W36iVf
		BW25113	DP98	pBAD24_lambda red barcode 1	To replace lambda red genes with a synthetic DNA segment encoding randomized barcode	This study	https://benchling.com/s/seq-vwZ5krPRFx8qQC6TsUu9
		BW25113	DP101	pBFC0423_lambda_red_2x	Derivative of pBFC0423 expressing two gRNA's targeting lambda red genes	This study	https://benchling.com/s/seq-RLgJIhJmFuSaFjuBgbMf
		BW25113	lambdap01	nu1	DNA packaging protein
		BW25113	lambdap02	A	TerL
		BW25113	lambdap03	W	gpW family protein
		BW25113	lambdap04	B	portal
		BW25113	lambdap05	C	S49 family peptidase/capsid component; Viral protease
		BW25113	lambdap06	nu3	scaffolding protein
		BW25113	lambdap07	D	head decoration protein
		BW25113	lambdap08	E	major capsid protein
		BW25113	lambdap09	Fi	DNA packaging protein FI
		BW25113	lambdap10	Fii	head-tail joining protein
		BW25113	lambdap11	Z	tail protein
		BW25113	lambdap12	U	tail protein
		BW25113	lambdap13	V	tail protein
		BW25113	lambdap14	G	minor tail protein G
		BW25113	lambdap15	T	tail assembly protein T
		BW25113	lambdap16	H	tail tape measure protein
		BW25113	lambdap17	M	tail protein
		BW25113	lambdap18	L	minor tail protein L
		BW25113	lambdap19	K	tail protein
		BW25113	lambdap20	I	tail component
		BW25113	lambdap21	J	host specificity protein J
		BW25113	lambdap26	lom	Outer membrane beta-barrel protein Lom
		BW25113	lambdap27	stf	protail fiber N-terminal domain containing protein
		BW25113	lambdap90	orf206b	hypothetical protein; deleted in genome map because there is another gene in the + strand
		BW25113	lambdap28	tfa	tail fiber protein
		BW25113	lambdap29	orf-194	tail fiber assembly protein
		BW25113	lambdap80	ea47
		BW25113	lambdap81	ea31
		BW25113	lambdap82	ea59	ATP-dependent endonuclease
		BW25113	lambdap33	int	tyrosine-type recombinase/integrase
		BW25113	lambdap34	xis	excisionase
		BW25113	lambdap36	ea8.5
		BW25113	lambdap83	ea22	ead/Ea22-like family protein
		BW25113	lambdap37	orf61	hypothetical protein
		BW25113	lambdap38	orf63	DUF1382 family protein
		BW25113	lambdap39	orf60a	DUF1317 domin-containing protein
		BW25113	lambdap41	exo	YqaJ viral recombinase family protein
		BW25113	lambdap84	bet	recombination protein Bet
		BW25113	lambdap42	gam	host-nuclease inhibitor protein Gam
		BW25113	lambdap85	kil	host cell division inhibitory peptide Kil
		BW25113	lambdap86	cIII	protease FtsH-inhibitory lysogeny factor CIII
		BW25113	lambdap45	ea10	DUF2528 family protein
		BW25113	lambdap46	ral	Restriction inhibitor protein ral
		BW25113	lambdap47	orf28	hypothetical protein
		BW25113	lambdap48	sieB	Superinfection exclusion protein B
		BW25113	lambdap49	N	antitermination protein N
		BW25113	lambdap53	rexB	exclusion protein
		BW25113	lambdap87	rexA	exclusion protein
		BW25113	lambdap88	cI	lysogenic repressor
		BW25113	lambdap57	cro	lytic repressor
		BW25113	lambdap89	O	replication protein
		BW25113	lambdap61	P	DNA replication protein
		BW25113	lambdap62	ren	protein ren
		BW25113	lambdap63	NinB	recombination protein NinB
		BW25113	lambdap64	NinC	phosphoadenosine phosphosulfate reductase family protein
		BW25113	lambdap67	NinF
		BW25113	lambdap68	NinG	recombination protein NinG
		BW25113	lambdap70	NinI	serine/threonine phosphatase
		BW25113	lambdap71	Q	antitermination protein
		BW25113	lambdap73	orf-64	hypothetical protein
		BW25113	lambdap74	S	holin/anti-holin
		BW25113	lambdap92	S'	holin/anti-holin
		BW25113	lambdap75	R	endolysin
		BW25113	lambdap76	Rz	I-spanin
		BW25113	lambdap77	bor	serum resistance lipoprotein Bor
		BW25113	lambdap78	-	putative envelope protein
		BW25113	lambdap79	-	hypothetical protein
		BW25113	P1_gp002	cra	cre associated function
		BW25113	P1_gp003	cre	cyclization recombinase
		BW25113	P1_gp004	c8	establishment of lysogeny
		BW25113	P1_gp005	ref	recombination enhancement
		BW25113	P1_gp006	mat	maturation control
		BW25113	P1_gp007	res	restriction component
		BW25113	P1_gp008	mod	modification component
		BW25113	P1_gp009	lxc	modulator of C1 action; enhances binding of C1 to all its operators; lowers expression of C1
		BW25113	P1_gp010	ulx	enhances incorporation of darB
		BW25113	P1_gp011	darB	antirestriction
		BW25113	P1_gp012	prt	portal
		BW25113	P1_gp013	pro	head processing
		BW25113	P1_gp115	lydE	putative antiholin
		BW25113	P1_gp014	lydD	putative holin
		BW25113	P1_gp015	lyz	lysozyme
		BW25113	P1_gp016	ssb	single stranded DNA binding protein
		BW25113	P1_gp017	isaA	IS1 insertion-associated gene
		BW25113	P1_gp018	insB	IS1 transposition protein
		BW25113	P1_gp019	insA	IS1 transposition protein
		BW25113	P1_gp020	isaB	IS1 insertion-associated gene
		BW25113	P1_gp021	hxr	possible repressor; homolog of Xre
		BW25113	P1_gp022	ddrB	antirestriction
		BW25113	P1_gp116	iddB	internal to ddrB
		BW25113	P1_gp023	ddrA	antirestriction
		BW25113	P1_gp024	darA	antirestriction
		BW25113	P1_gp025	hdf	antirestriction
		BW25113	P1_gp026	lydB	lysis determinant; prevents premature lysis
		BW25113	P1_gp027	lydA	holin
		BW25113	P1_gp028	lydC	holin
		BW25113	P1_gp029	cin	site-specific recombinase involved in C-segment inversion
		BW25113	P1_gp001	Sv prime	C-terminal moiety of tail fiber gpS
		BW25113	P1_gp030	U prime	structural protein gpU prime of tail fiber
		BW25113	P1_gp031	U	tail fiber structure or assembly
		BW25113	P1_gp032	S	tail fiber structure or assembly
		BW25113	P1_gp033	R	tail fiber structure or assembly
		BW25113	P1_gp034	16	baseplate or tail tube
		BW25113	P1_gp035	bplA	putative baseplate structure, may correspond to gene 3
		BW25113	P1_gp036	pmgA	Putative morphogenetic function
		BW25113	P1_gp037	sit	putative tape measure protein
		BW25113	P1_gp038	pmgB	Putative morphogenetic function
		BW25113	P1_gp039	tub	tail tube
		BW25113	P1_gp040	pmgC	Putative morphogenetic function
		BW25113	P1_gp041	simC	superimmunity
		BW25113	P1_gp042	simB	superimmunity
		BW25113	P1_gp043	simA	superimmunity
		BW25113	P1_gr044	c4 RNA	acts on icd and ant mRNA
		BW25113	P1_gp045	icd	reversible inhibition of cell division
		BW25113	P1_gp046	ant1	antagonizes C1 represssion by forming a complex of Ant1/Ant2/C1
		BW25113	P1_gp047	ant2	product antagonizes C1 repression by formation of Ant1/Ant2/C1 complex
		BW25113	P1_gp048	ask	RNA antisense to 5' region and regulatory region of kilA gene; corresponds to former P53as RNA; negatively regulates lytic replication
		BW25113	P1_gp049	kilA	product can kill host
		BW25113	P1_gp050	repL	initiates replication at oriL
		BW25113	P1_gp051	rlfA	possibly associated with lytic replication
		BW25113	P1_gp052	rlfB	possibly associated with lytic replication
		BW25113	P1_gp053	pmgF	putative morphogenetic function
		BW25113	P1_gp054	bplB	baseplate structure
		BW25113	P1_gp055	pmgG	putative morphogenetic function
		BW25113	P1_gp056	21	baseplate or tail tube
		BW25113	P1_gp057	22	tail sheath
		BW25113	P1_gp058	23	Major head protein
		BW25113	P1_gp059	parB	active partitioning of P1 plasmid during cell division
		BW25113	P1_gp060	parA	active partitioning of P1 plasmid during cell division
		BW25113	P1_gp061	repA	initiates replication from oriR; plasmid replication
		BW25113	P1_gp062	upfA
		BW25113	P1_gp063	mlp	membrane lipoprotein precursor
		BW25113	P1_gp064	ppfA	possible periplasmic function
		BW25113	P1_gp065	upfB
		BW25113	P1_gp066	upfC
		BW25113	P1_gp067	uhr
		BW25113	P1_gp068	hrdC	hpothetical recombination associated protein of RdgC family
		BW25113	P1_gp069	dmt-B	DNA methlytransferases; methlysates A at GATC and perhaps also at C5 cytosine in unknown sequences
		BW25113	P1_gp070	dmt-A
		BW25113	P1_gt071	trnT
		BW25113	P1_gp072	plp	putative lipoprotein
		BW25113	P1_gp073	upl
		BW25113	P1_gp074	tciA	tellurite or colicin resistance or inhibition of cell division
		BW25113	P1_gp075	tciB	tellurite or colicin resistance or inhibition of cell division
		BW25113	P1_gp076	tciC	tellurite or colicin resistance or inhibition of cell division
		BW25113	P1_gt117	trnI
		BW25113	P1_gp077	ban	dnaB homolog
		BW25113	P1_gp078	dbn	downstream of ban
		BW25113	P1_gp079	5	baseplate
		BW25113	P1_gp080	6	tail length
		BW25113	P1_gp081	24	baseplate or tail stability
		BW25113	P1_gp082	7	tail stability
		BW25113	P1_gp083	25	tail stability
		BW25113	P1_gp084	26	baseplate; some similarity to non-muscle myosin II heavy chain and Pseudomonas aeruginosa TolA
		BW25113	P1_gp085	pmgL	putative morphogenetic function
		BW25113	P1_gp086	pmgM	putative morphogenetic function
		BW25113	P1_gp087	pmgN	putative morphogenetic function
		BW25113	P1_gp088	pmgO	putative morphogenetic function
		BW25113	P1_gp089	pmgP	putative morphogenetic function
		BW25113	P1_gp090	ppp	protein phosphatase
		BW25113	P1_gp091	pmgQ	putative morphogenetic function
		BW25113	P1_gp092	pmgR	putative morphogenetic function
		BW25113	P1_gp093	pmgS	putative morphogenetic function
		BW25113	P1_gp094	pap	acid phosphatase
		BW25113	P1_gp095	pmgT	putative morphogenetic function
		BW25113	P1_gp096	pmgU	putative morphogenetic function
		BW25113	P1_gp097	pmgV	putative morphogenetic function
		BW25113	P1_gp098	upfM	unknown protein function
		BW25113	P1_gp099	upfN	unknown protein function
		BW25113	P1_gp100	upfO	unknown protein function
		BW25113	P1_gp101	hot	DNA replication
		BW25113	P1_gp102	lxr	LexA-regulated functions
		BW25113	P1_gp103	humD	DNA repair
		BW25113	P1_gp104	phd	anti-toxin of P1 toxin-antitoxin system
		BW25113	P1_gp105	doc	toxin of P1 toxin-antitoxin system
		BW25113	P1_gp106	pdcA	unknown protein function
		BW25113	P1_gp107	pdcB	unknown function
		BW25113	P1_gp108	lpa	late promoter activator
		BW25113	P1_gp109	pacA	DNA packaging
		BW25113	P1_gp110	pacB	DNA packaging
		BW25113	P1_gp111	c1	lytic repressor
		BW25113	P1_gp112	coi	C1 inactivator
		BW25113	P1_gp113	imcB	immunity function
		BW25113	P1_gp114	imcA	immunity function
References
1	Guzman L.M., Belin D., Carson M.J., Beckwith J. Tight regulation, modulation, and high-level expression by vectors containing the arabinose PBAD promoter. J. Bacteriol. 1995;177:4121–4130. doi: 10.1128/jb.177.14.4121-4130.1995.

## Sheet: Phages
Supplementary Table 1. Bacterial strains and phages
Strains, phages or plasmids	S. No.	Description	Genotype or relevant characteristics	Reference/source	Sequence links
		P1vir		Jason J. Gill (Texas A&M University)
		lambda cI857		Lab stock
		lambda_red_barcode1	Lambda barcode genome locus	This study	https://benchling.com/s/seq-cZd7oGGBBOuLum521brI
		P1_cra-darB_barcode	P1 barcode genome locus	This study	https://benchling.com/s/seq-SurUnhthAbcqyKz5Aa6S
		P1_res_barcode1	P1 barcode genome locus	This study	https://benchling.com/s/seq-D3CTS1M0ywOBHJkFMvmg
