# Supplementary material for: Systematic and scalable genome-wide essentiality mapping to identify nonessential genes in phages
Source: PLoS Biol. 2023 Dec 4;21(12):e3002416. doi: 10.1371/journal.pbio.3002416 (PMC10695390; doi:10.1371/journal.pbio.3002416)
Supplement: S2 Table — (XLSX) [file pbio.3002416.s006.xlsx]

## Sheet: Sheet1
Supplementary Table 2: List of primers used in this work
S. No	Name	Sequence (5'-3')	Purpose
99	pBAD24-F	cactttgctatgccatagcatttttatcc	To amplify insert in pBAD24 vector for sequencing purpose
100	pBAD24-R	CACACTACCATCGGCGCTA
159	cas12a-guide-F	CCTGAAGTCAGCCCCATACGATATAAG	To PCR and sequence guide region in DP 50
160	cas12a-guide-R	CGGACCAAAACGAAAAAAGGCCC
231	pBAD24_barcode1 FWD	tcaagagcgcattaccataaatcctctagagtcgacctgca	For PCR amplification and gibson assembly of the barcodes into pBAD24
232	pBAD24_barcode1 REV	aatgtgaacccttttgacatccccgggtaccatggtgaat
233	P1_res_barcode1 FWD	attcaccatggtacccggggatgtcaaaagggttcacattcg
234	P1_res_barcode1 REV	gcaggtcgactctagaggatttatggtaatgcgctcttgat
239	P1_barcode1 358-381 FWD 1	tcagatgaagattttgccccaaac	To PCR amplify and sequence recombinant P1vir with barcode in res locus
240	P1_barcode1 918-941 REV 1	aggaaccatcgttactaagtccac
245	res-R	TCACGCTCATAATCATCTCTAAAGTG	To amplify wt res locus in P1vir: Use in pair with 239
249	pBAD24-bc-F	atcctctagagtcgacctgcagg
250	pBAD24-bc-R	ccccgggtaccatggtgaattc
251	P1-gblock-F	tttttgggctagcaggaggaattcac
252	P1-gblock-R	acagccaagcttgcatgcctg
253	pBAD24_res_F	agattaggaaaatgagctagggcgcttttcaatcaaataagtca	To amplify pBAD24 vector with res homology region
254	pBAD24_res_R	tcggttcgtaaactgtaatgcctcctgatgagatgtcgcg
273	P1-cra-F	catacagttcaataccttagcaggtc	To check barcode insertion in the P1 genome between cra and darB ene
274	P1-darB-R	ccgaggatagcgtgattttattgtc
275	P1-tas-R	tccctttgcgctggataaattttg	Use in pair with primer 239: To check if the tas gene locus is inserted into P1 res locus: same principle as in P1-res-barcode1
284	red-F	GATCAAACACTTATGGCtatccagac	To PCR red gene locus in lambda after inserting barcode
285	red-R	gtggatttcggataacagaaaggc
CRISPRi Oligos For Phage Lambda
Well Position	Name	Sequence	Name	Sequence
B6	lambdap01_1_FWD	AGATtgactctgccgccgtcataaaatggtatG	lambdap01_1_REV	GAAACataccattttatgacggcggcagagtca
B7	lambdap02_1_FWD	AGATtgaaaacccacgttgagccgactattcgG	lambdap02_1_REV	GAAACcgaatagtcggctcaacgtgggttttca
B8	lambdap03_1_FWD	AGATcggccacttccgtgtctgacctgaaaaaG	lambdap03_1_REV	GAAACtttttcaggtcagacacggaagtggccg
B9	lambdap04_1_FWD	AGATccgcgaggttgaagcggcatggaaagagG	lambdap04_1_REV	GAAACctctttccatgccgcttcaacctcgcgg
B10	lambdap05_1_FWD	AGATactgcgctgacatcatcgcccgtgtgcgG	lambdap05_1_REV	GAAACcgcacacgggcgatgatgtcagcgcagt
B11	lambdap06_1_FWD	AGATcgcagaaggtgtcggcatataccggcctG	lambdap06_1_REV	GAAACaggccggtatatgccgacaccttctgcg
B12	lambdap07_1_FWD	AGATcccattaccagccgcagggcaacagtgaG	lambdap07_1_REV	GAAACtcactgttgccctgcggctggtaatggg
C1	lambdap08_1_FWD	AGATcgccgggatatgtcaagccgaagcatgaG	lambdap08_1_REV	GAAACtcatgcttcggcttgacatatcccggcg
C2	lambdap09_1_FWD	AGATtgctgccgggaacggcgtttcgtgtctcG	lambdap09_1_REV	GAAACgagacacgaaacgccgttcccggcagca
C3	lambdap10_1_FWD	AGATatgaccctgaaaatatcagctatgccggG	lambdap10_1_REV	GAAACccggcatagctgatattttcagggtcat
C4	lambdap11_1_FWD	AGATcccgtaatcaagctgggtaatgcgcgggG	lambdap11_1_REV	GAAACcccgcgcattacccagcttgattacggg
C5	lambdap12_1_FWD	AGATatggtcgccccgctgtttttgatgaggcG	lambdap12_1_REV	GAAACgcctcatcaaaaacagcggggcgaccat
C6	lambdap13_1_FWD	AGATagacgttgactggtcgcgtctggcaaaaG	lambdap13_1_REV	GAAACttttgccagacgcgaccagtcaacgtct
C7	lambdap14_1_FWD	AGATaacataacggtgtgaccgtcacgctttcG	lambdap14_1_REV	GAAACgaaagcgtgacggtcacaccgttatgtt
C8	lambdap15_1_FWD	AGATcagtacccattattttcatgatgttctgG	lambdap15_1_REV	GAAACcagaacatcatgaaaataatgggtactg
C9	lambdap16_1_FWD	AGATaccagaccagcgagtcactcagcgcactG	lambdap16_1_REV	GAAACagtgcgctgagtgactcgctggtctggt
C10	lambdap17_1_FWD	AGATgtgatggctattctcagcgagcgcctgcG	lambdap17_1_REV	GAAACgcaggcgctcgctgagaatagccatcac
C11	lambdap18_1_FWD	AGATtgtaatgagcagaacgaaaaaggtgagcG	lambdap18_1_REV	GAAACgctcacctttttcgttctgctcattaca
C12	lambdap19_1_FWD	AGATccgtggtggctggtctgccgggggacgaG	lambdap19_1_REV	GAAACtcgtcccccggcagaccagccaccacgg
D1	lambdap20_1_FWD	AGATgtcagaaactgagcgacggctggtatcaG	lambdap20_1_REV	GAAACtgataccagccgtcgctcagtttctgac
D2	lambdap21_1_FWD	AGATaaccggcatacagcaacaacatggcctgG	lambdap21_1_REV	GAAACcaggccatgttgttgctgtatgccggtt
D3	lambdap26_1_FWD	AGATcggtgggctattttcaagtgaaaccgggG	lambdap26_1_REV	GAAACcccggtttcacttgaaaatagcccaccg
D4	lambdap27_1_FWD	AGATtctgtgccatgacggaggatgatgcccgG	lambdap27_1_REV	GAAACcgggcatcatcctccgtcatggcacaga
D5	lambdap90_1_FWD	AGATctctgcgatgctgataccgcacttcccgG	lambdap90_1_REV	GAAACcgggaagtgcggtatcagcatcgcagag
D6	lambdap28_1_FWD	AGATcggcaggtgcgccgatcccgtggccatcG	lambdap28_1_REV	GAAACgatggccacgggatcggcgcacctgccg
D7	lambdap29_1_FWD	AGATtggctgttttcaacagtgatgaggcatcG	lambdap29_1_REV	GAAACgatgcctcatcactgttgaaaacagcca
D8	lambdap80_1_FWD	AGATgaaatgtatagcgaggcaaaggctactcG	lambdap80_1_REV	GAAACgagtagcctttgcctcgctatacatttc
D9	lambdap81_1_FWD	AGATcctacgacaggacacaccctcttgagccG	lambdap81_1_REV	GAAACggctcaagagggtgtgtcctgtcgtagg
D10	lambdap82_1_FWD	AGATaacataaccttcttaaagctattcaggaG	lambdap82_1_REV	GAAACtcctgaatagctttaagaaggttatgtt
D11	lambdap32_1_FWD	AGATgattaggcagagacaggcgaatcgcaatG	lambdap32_1_REV	GAAACattgcgattcgcctgtctctgcctaatc
D12	lambdap33_1_FWD	AGATaggacacaaacacaagcctctgacagcgG	lambdap33_1_REV	GAAACcgctgtcagaggcttgtgtttgtgtcct
E1	lambdap34_1_FWD	AGATaagaggatcagaaatgggaagaaggcgaG	lambdap34_1_REV	GAAACtcgccttcttcccatttctgatcctctt
E2	lambdap36_1_FWD	AGATtgtagatgaaggtatagatatagagtcgG	lambdap36_1_REV	GAAACcgactctatatctataccttcatctaca
E3	lambdap83_1_FWD	AGATacgcagaccttttccatgaattggtaacG	lambdap83_1_REV	GAAACgttaccaattcatggaaaaggtctgcgt
E4	lambdap37_1_FWD	AGATtggcagcgggcttcatattctgtgtgctG	lambdap37_1_REV	GAAACagcacacagaatatgaagcccgctgcca
E5	lambdap38_1_FWD	AGATtgccaataccagtagaaacagacgaagaG	lambdap38_1_REV	GAAACtcttcgtctgtttctactggtattggca
E6	lambdap39_1_FWD	AGATgtctactccgttacaaagcgaggctgggG	lambdap39_1_REV	GAAACcccagcctcgctttgtaacggagtagac
E7	lambdap40_1_FWD	AGATttagcttaaatcgcttatatctggcgctG	lambdap40_1_REV	GAAACagcgccagatataagcgatttaagctaa
E8	lambdap41_1_FWD	AGATcaccggtgtggctccggaagttaacgctG	lambdap41_1_REV	GAAACagcgttaacttccggagccacaccggtg
E9	lambdap84_1_FWD	AGATcgcctttcctgataagcagaatggcatcG	lambdap84_1_REV	GAAACgatgccattctgcttatcaggaaaggcg
E10	lambdap42_1_FWD	AGATacagctatttcaggagttcagccatgaaG	lambdap42_1_REV	GAAACttcatggctgaactcctgaaatagctgt
E11	lambdap43_1_FWD	AGATtctcaatattatatggatcatagctggcG	lambdap43_1_REV	GAAACgccagctatgatccatataatattgaga
E12	lambdap44_1_FWD	AGATtctcaatattatatggatcatagctggcG	lambdap44_1_REV	GAAACgccagctatgatccatataatattgaga
F1	lambdap85_1_FWD	AGATttggcgatgaaaagatgtttcgtgaagcG	lambdap85_1_REV	GAAACgcttcacgaaacatcttttcatcgccaa
F2	lambdap86_1_FWD	AGATcttgaacgaatcacccgtaaattacgtgG	lambdap86_1_REV	GAAACcacgtaatttacgggtgattcgttcaag
F3	lambdap45_1_FWD	AGATtctcaatattatatggatcatagctggcG	lambdap45_1_REV	GAAACgccagctatgatccatataatattgaga
F4	lambdap46_1_FWD	AGATgttcaggactacaactgccacacaccacG	lambdap46_1_REV	GAAACgtggtgtgtggcagttgtagtcctgaac
F5	lambdap47_1_FWD	AGATaagagttcgaagagcatcctcaggatgtG	lambdap47_1_REV	GAAACacatcctgaggatgctcttcgaactctt
F6	lambdap48_1_FWD	AGATagcccagataactggcctgaatatgttaG	lambdap48_1_REV	GAAACtaacatattcaggccagttatctgggct
F7	lambdap49_1_FWD	AGATgttcaggactacaactgccacacaccacG	lambdap49_1_REV	GAAACgtggtgtgtggcagttgtagtcctgaac
F8	lambdap50_1_FWD	AGATtgaaaaaaagaaaaatgaacttggcttaG	lambdap50_1_REV	GAAACtaagccaagttcatttttctttttttca
F9	lambdap51_1_FWD	AGATctgacggaatgttaattctcgttgacccG	lambdap51_1_REV	GAAACgggtcaacgagaattaacattccgtcag
F10	lambdap52_1_FWD	AGATtttttcagctcatagagatggtcttgggG	lambdap52_1_REV	GAAACcccaagaccatctctatgagctgaaaaa
F11	lambdap53_1_FWD	AGATtttttcagctcatagagatggtcttgggG	lambdap53_1_REV	GAAACcccaagaccatctctatgagctgaaaaa
F12	lambdap87_1_FWD	AGATtctttaccaaaacaaatgacaagagtctG	lambdap87_1_REV	GAAACagactcttgtcatttgttttggtaaaga
G1	lambdap88_1_FWD	AGATtttaatggcatcaatgcattaaatgcttG	lambdap88_1_REV	GAAACaagcatttaatgcattgatgccattaaa
G2	lambdap54_1_FWD	AGATccggacaggagcgtaatgtggcagatctG	lambdap54_1_REV	GAAACagatctgccacattacgctcctgtccgg
G3	lambdap55_1_FWD	AGATggcaaaccaagacagctaaagatctcggG	lambdap55_1_REV	GAAACccgagatctttagctgtcttggtttgcc
G4	lambdap56_1_FWD	AGATggcaaaccaagacagctaaagatctcggG	lambdap56_1_REV	GAAACccgagatctttagctgtcttggtttgcc
G5	lambdap57_1_FWD	AGATggcaaaccaagacagctaaagatctcggG	lambdap57_1_REV	GAAACccgagatctttagctgtcttggtttgcc
G6	lambdap58_1_FWD	AGATggcaaaccaagacagctaaagatctcggG	lambdap58_1_REV	GAAACccgagatctttagctgtcttggtttgcc
G7	lambdap60_1_FWD	AGATttcagaacgctcggttgccgccgggcgtG	lambdap60_1_REV	GAAACacgcccggcggcaaccgagcgttctgaa
G8	lambdap89_1_FWD	AGATaagtgctgcttgccattctgcgtaaaacG	lambdap89_1_REV	GAAACgttttacgcagaatggcaagcagcactt
G9	lambdap61_1_FWD	AGATccggcgagcctggctaaccgtgaccagaG	lambdap61_1_REV	GAAACtctggtcacggttagccaggctcgccgg
G10	lambdap62_1_FWD	AGATctaccagggaagaacgggaaggaaagatG	lambdap62_1_REV	GAAACatctttccttcccgttcttccctggtag
G11	lambdap63_1_FWD	AGATaaattcgatctccagcacatcagcaaaaG	lambdap63_1_REV	GAAACttttgctgatgtgctggagatcgaattt
G12	lambdap64_1_FWD	AGATtcagggaagttgtgaagttctgggatatG	lambdap64_1_REV	GAAACatatcccagaacttcacaacttccctga
H1	lambdap67_1_FWD	AGATacgtgcgctaactgcggtcagaagctgcG	lambdap67_1_REV	GAAACgcagcttctgaccgcagttagcgcacgt
H2	lambdap68_1_FWD	AGATaccctgcattcgctaatcagtggtggtgG	lambdap68_1_REV	GAAACcaccaccactgattagcgaatgcagggt
H3	lambdap70_1_FWD	AGATgttgatcgtggtgcagagaacgttgaatG	lambdap70_1_REV	GAAACattcaacgttctctgcaccacgatcaac
H4	lambdap71_1_FWD	AGATcggtactgatgtgatggctgctatggggG	lambdap71_1_REV	GAAACccccatagcagccatcacatcagtaccg
H5	lambdap73_1_FWD	AGATgggattttttatatctgcacaacaggtaG	lambdap73_1_REV	GAAACtacctgttgtgcagatataaaaaatccc
H6	lambdap74_1_FWD	AGATcaatggcgtaccttcgcggcagatataaG	lambdap74_1_REV	GAAACttatatctgccgcgaaggtacgccattg
H7	lambdap92_1_FWD	AGATcaatggcgtaccttcgcggcagatataaG	lambdap92_1_REV	GAAACttatatctgccgcgaaggtacgccattg
H8	lambdap75_1_FWD	AGATctgattactccgatcaccctcgcaaactG	lambdap75_1_REV	GAAACagtttgcgagggtgatcggagtaatcag
H9	lambdap76_1_FWD	AGATaccctcagagagaggctgatcactatgcG	lambdap76_1_REV	GAAACgcatagtgatcagcctctctctgagggt
H10	lambdap77_1_FWD	AGATctgttcaaaacaaaccggcagcagtagcG	lambdap77_1_REV	GAAACgctactgctgccggtttgttttgaacag
H11	lambdap78_1_FWD	AGATccaatggctcaggttgccatttttaaagG	lambdap78_1_REV	GAAACctttaaaaatggcaacctgagccattgg
H12	lambdap79_1_FWD	AGATtatgagttaccctgatgttgtaattgcaG	lambdap79_1_REV	GAAACtgcaattacaacatcagggtaactcata
CRISPRi Oligos For Phage P`1
Well Position	Name	Sequence	Name	Sequence
A1	P1_gp002_1_FWD	AGATatcgtgatagttgccaactgtcattatcG	P1_gp002_1_REV	GAAACgataatgacagttggcaactatcacgat
A2	P1_gp003_1_FWD	AGATccgcagaacctgaagatgttcgcgattaG	P1_gp003_1_REV	GAAACtaatcgcgaacatcttcaggttctgcgg
A3	P1_gp004_1_FWD	AGATaacatcgacggaaaatatgtagtgctgtG	P1_gp004_1_REV	GAAACacagcactacatattttccgtcgatgtt
A4	P1_gp005_1_FWD	AGATtagatggcaccaccagcatgcagctccgG	P1_gp005_1_REV	GAAACcggagctgcatgctggtggtgccatcta
A5	P1_gp006_1_FWD	AGATgatgagcgtcggcaaaccggcgtcaatgG	P1_gp006_1_REV	GAAACcattgacgccggtttgccgacgctcatc
A6	P1_gp007_1_FWD	AGATaattccacttatgatgttggcttgcttgG	P1_gp007_1_REV	GAAACcaagcaagccaacatcataagtggaatt
A7	P1_gp008_1_FWD	AGATggcaaggtaattttgttgcaaaactcccG	P1_gp008_1_REV	GAAACgggagttttgcaacaaaattaccttgcc
A8	P1_gp009_1_FWD	AGATctgacaagcataacgttgaggtgcgcagG	P1_gp009_1_REV	GAAACctgcgcacctcaacgttatgcttgtcag
A9	P1_gp010_1_FWD	AGATttcctgtcagggctacgcgggcgattacG	P1_gp010_1_REV	GAAACgtaatcgcccgcgtagccctgacaggaa
A10	P1_gp011_1_FWD	AGATcccagatggcaaatgtccgcgataagtaG	P1_gp011_1_REV	GAAACtacttatcgcggacatttgccatctggg
A11	P1_gp012_1_FWD	AGATcagcacgatcgccaccgcgctgaacatcG	P1_gp012_1_REV	GAAACgatgttcagcgcggtggcgatcgtgctg
A12	P1_gp013_1_FWD	AGATcgccttggtgagcttttcggctattacgG	P1_gp013_1_REV	GAAACcgtaatagccgaaaagctcaccaaggcg
B1	P1_gp115_1_FWD	AGATagcatggctgcaagattgatgcagcagaG	P1_gp115_1_REV	GAAACtctgctgcatcaatcttgcagccatgct
B2	P1_gp014_1_FWD	AGATgactcgattttcatggcggtatatgtgcG	P1_gp014_1_REV	GAAACgcacatataccgccatgaaaatcgagtc
B3	P1_gp015_1_FWD	AGATcgctatcgcggtgatgattaccatcgtaG	P1_gp015_1_REV	GAAACtacgatggtaatcatcaccgcgatagcg
B4	P1_gp016_1_FWD	AGATttcggaaaacttgctgaaattgcgagtgG	P1_gp016_1_REV	GAAACcactcgcaatttcagcaagttttccgaa
B5	P1_gp017_1_FWD	AGATagcagagaaaagactatgacagcacaaaG	P1_gp017_1_REV	GAAACtttgtgctgtcatagtcttttctctgct
B6	P1_gp018_1_FWD	AGATcgccatttaaaaaactcaggccgcagtcG	P1_gp018_1_REV	GAAACgactgcggcctgagttttttaaatggcg
B7	P1_gp019_1_FWD	AGATtatcagctgtccctcctgttcagctactG	P1_gp019_1_REV	GAAACagtagctgaacaggagggacagctgata
B8	P1_gp020_1_FWD	AGATtgctgatttaaacgggagtggtacacaaG	P1_gp020_1_REV	GAAACttgtgtaccactcccgtttaaatcagca
B9	P1_gp021_1_FWD	AGATatgataatgaagaagtttccgggcgtttG	P1_gp021_1_REV	GAAACaaacgcccggaaacttcttcattatcat
B10	P1_gp022_1_FWD	AGATttgatgccgacagcataacaccggcgatG	P1_gp022_1_REV	GAAACatcgccggtgttatgctgtcggcatcaa
B11	P1_gp116_1_FWD	AGATtatacggtctacaagttgccgtgttggtG	P1_gp116_1_REV	GAAACaccaacacggcaacttgtagaccgtata
B12	P1_gp023_1_FWD	AGATctggctgataaattcgtcgatcagagcaG	P1_gp023_1_REV	GAAACtgctctgatcgacgaatttatcagccag
C1	P1_gp024_1_FWD	AGATatagcccgacagcggaaaaccggatcacG	P1_gp024_1_REV	GAAACgtgatccggttttccgctgtcgggctat
C2	P1_gp025_1_FWD	AGATagcgcctgcaagaagcaaaacagcggaaG	P1_gp025_1_REV	GAAACttccgctgttttgcttcttgcaggcgct
C3	P1_gp026_1_FWD	AGATatccgggtgccgttcaagtaccggtctaG	P1_gp026_1_REV	GAAACtagaccggtacttgaacggcacccggat
C4	P1_gp027_1_FWD	AGATagtaattggtgggataggcacgttcctgG	P1_gp027_1_REV	GAAACcaggaacgtgcctatcccaccaattact
C5	P1_gp028_1_FWD	AGATtgaatggggtttgtgaaaaacgttacgaG	P1_gp028_1_REV	GAAACtcgtaacgtttttcacaaaccccattca
C6	P1_gp029_1_FWD	AGATaggacaaggcgagcggcaaaaaggctgaG	P1_gp029_1_REV	GAAACtcagcctttttgccgctcgccttgtcct
C7	P1_gp001_1_FWD	AGATaacggcgggatcaccggggcgctgacagG	P1_gp001_1_REV	GAAACctgtcagcgccccggtgatcccgccgtt
C8	P1_gp030_1_FWD	AGATcagtatgatacgttgaaaatggcctatgG	P1_gp030_1_REV	GAAACcataggccattttcaacgtatcatactg
C9	P1_gp031_1_FWD	AGATaaccagacaccataaagattgtttacgaG	P1_gp031_1_REV	GAAACtcgtaaacaatctttatggtgtctggtt
C10	P1_gp032_1_FWD	AGATagactctgtaaccagtaccagaagtgatG	P1_gp032_1_REV	GAAACatcacttctggtactggttacagagtct
C11	P1_gp033_1_FWD	AGATatcagcaaggccgttttcggtaccagttG	P1_gp033_1_REV	GAAACaactggtaccgaaaacggccttgctgat
C12	P1_gp034_1_FWD	AGATcatgagcaaggaggatctggagaccaggG	P1_gp034_1_REV	GAAACcctggtctccagatcctccttgctcatg
D1	P1_gp035_1_FWD	AGATatatctgacgaccagtacccttacatgaG	P1_gp035_1_REV	GAAACtcatgtaagggtactggtcgtcagatat
D2	P1_gp036_1_FWD	AGATtatgagtggctaaacacttatcagggtgG	P1_gp036_1_REV	GAAACcaccctgataagtgtttagccactcata
D3	P1_gp037_1_FWD	AGATggcgtaaatcacaaaatagtgccgatgtG	P1_gp037_1_REV	GAAACacatcggcactattttgtgatttacgcc
D4	P1_gp038_1_FWD	AGATctggctcccgtgaaacaccggtcgagacG	P1_gp038_1_REV	GAAACgtctcgaccggtgtttcacgggagccag
D5	P1_gp039_1_FWD	AGATccaaagacattacctaccacgattacagG	P1_gp039_1_REV	GAAACctgtaatcgtggtaggtaatgtctttgg
D6	P1_gp040_1_FWD	AGATattgcggatgaaccggccttactggaatG	P1_gp040_1_REV	GAAACattccagtaaggccggttcatccgcaat
D7	P1_gp041_1_FWD	AGATtctggatttgcttcgaaagcaatgaacaG	P1_gp041_1_REV	GAAACtgttcattgctttcgaagcaaatccaga
D8	P1_gp042_1_FWD	AGATacatttaatgtttttgctgatgaagttgG	P1_gp042_1_REV	GAAACcaacttcatcagcaaaaacattaaatgt
D9	P1_gp043_1_FWD	AGATtggctgggactgttaatgcagcatcaagG	P1_gp043_1_REV	GAAACcttgatgctgcattaacagtcccagcca
D10	P1_gr044_1_FWD	AGATactaacgccagtctgtcaaccctgtcacG	P1_gr044_1_REV	GAAACgtgacagggttgacagactggcgttagt
D11	P1_gp045_1_FWD	AGATtattcctgtaaaaaacaccactatcactG	P1_gp045_1_REV	GAAACagtgatagtggtgttttttacaggaata
D12	P1_gp046_1_FWD	AGATattgaacaaggacgtctacgttacgcaaG	P1_gp046_1_REV	GAAACttgcgtaacgtagacgtccttgttcaat
E1	P1_gp047_1_FWD	AGATcacaaaaagtgcaaaatcccatggcacaG	P1_gp047_1_REV	GAAACtgtgccatgggattttgcactttttgtg
E2	P1_gp048_1_FWD	AGATttgcattttttctccaaatttgcatcaaG	P1_gp048_1_REV	GAAACttgatgcaaatttggagaaaaaatgcaa
E3	P1_gp049_1_FWD	AGATtggtgttgaaattacgaccgaccgcgctG	P1_gp049_1_REV	GAAACagcgcggtcggtcgtaatttcaacacca
E4	P1_gp050_1_FWD	AGATtggctatgaattggcctgctttgtaacaG	P1_gp050_1_REV	GAAACtgttacaaagcaggccaattcatagcca
E5	P1_gp051_1_FWD	AGATgaaatcaagtggactaaagtatctgcgtG	P1_gp051_1_REV	GAAACacgcagatactttagtccacttgatttc
E6	P1_gp052_1_FWD	AGATatatctaatataacgtttaagggtctccG	P1_gp052_1_REV	GAAACggagacccttaaacgttatattagatat
E7	P1_gp053_1_FWD	AGATcgaggagcattattggattctctatgatG	P1_gp053_1_REV	GAAACatcatagagaatccaataatgctcctcg
E8	P1_gp054_1_FWD	AGATcaggccatgaagatatcagcgtactggtG	P1_gp054_1_REV	GAAACaccagtacgctgatatcttcatggcctg
E9	P1_gp055_1_FWD	AGATccggtatgtccatgggatctgtttctggG	P1_gp055_1_REV	GAAACccagaaacagatcccatggacataccgg
E10	P1_gp056_1_FWD	AGATgctttgaactctgatcctgtgcagctgaG	P1_gp056_1_REV	GAAACtcagctgcacaggatcagagttcaaagc
E11	P1_gp057_1_FWD	AGATctatctacgttgatgatggtgatccgtgG	P1_gp057_1_REV	GAAACcacggatcaccatcatcaacgtagatag
E12	P1_gp058_1_FWD	AGATtgacggtgttatgcgtctgcctttattcG	P1_gp058_1_REV	GAAACgaataaaggcagacgcataacaccgtca
F1	P1_gp059_1_FWD	AGATttgatcagcataacaacgggcgtgaccaG	P1_gp059_1_REV	GAAACtggtcacgcccgttgttatgctgatcaa
F2	P1_gp060_1_FWD	AGATgataaacgccctgctggctcttcaatgaG	P1_gp060_1_REV	GAAACtcattgaagagccagcagggcgtttatc
F3	P1_gp061_1_FWD	AGATccagctggagatagctaaagccgagggtG	P1_gp061_1_REV	GAAACaccctcggctttagctatctccagctgg
F4	P1_gp062_1_FWD	AGATgagcttgccgatcagcttggtttaaaacG	P1_gp062_1_REV	GAAACgttttaaaccaagctgatcggcaagctc
F5	P1_gp063_1_FWD	AGATacgccgacgccgacaaaggttaaccaccG	P1_gp063_1_REV	GAAACggtggttaacctttgtcggcgtcggcgt
F6	P1_gp064_1_FWD	AGATcgcacttgttggtgctgggtttgcatggG	P1_gp064_1_REV	GAAACccatgcaaacccagcaccaacaagtgcg
F7	P1_gp065_1_FWD	AGATaacgatcagaacaaccgcaaccggtttaG	P1_gp065_1_REV	GAAACtaaaccggttgcggttgttctgatcgtt
F8	P1_gp066_1_FWD	AGATttcggggcacggaggattcccatccaggG	P1_gp066_1_REV	GAAACcctggatgggaatcctccgtgccccgaa
F9	P1_gp067_1_FWD	AGATcctcattgggaatcagagcggaacaaatG	P1_gp067_1_REV	GAAACatttgttccgctctgattcccaatgagg
F10	P1_gp068_1_FWD	AGATtccttgttgaagcaaagcgcgaaacaaaG	P1_gp068_1_REV	GAAACtttgtttcgcgctttgcttcaacaagga
F11	P1_gp069_1_FWD	AGATaaccaggtgatcgacctgaatcaggaaaG	P1_gp069_1_REV	GAAACtttcctgattcaggtcgatcacctggtt
F12	P1_gt071_1_FWD	AGATgctcagttggtagagcgcctgccttgtaG	P1_gt071_1_REV	GAAACtacaaggcaggcgctctaccaactgagc
G1	P1_gp072_1_FWD	AGATttcgtagattgggatatgaccccgttacG	P1_gp072_1_REV	GAAACgtaacggggtcatatcccaatctacgaa
G2	P1_gp073_1_FWD	AGATgtggagctaacggcgggtgatcgggccgG	P1_gp073_1_REV	GAAACcggcccgatcacccgccgttagctccac
G3	P1_gp074_1_FWD	AGATcgccgttctccggtgaaattgcccagatG	P1_gp074_1_REV	GAAACatctgggcaatttcaccggagaacggcg
G4	P1_gp075_1_FWD	AGATgtttttctcgtgctatctgtgctggtggG	P1_gp075_1_REV	GAAACccaccagcacagatagcacgagaaaaac
G5	P1_gp076_1_FWD	AGATctgacaagcatccaattgttctcgttgtG	P1_gp076_1_REV	GAAACacaacgagaacaattggatgcttgtcag
G6	P1_gt117_1_FWD	AGATgctcagtggttagagctggcgactcataG	P1_gt117_1_REV	GAAACtatgagtcgccagctctaaccactgagc
G7	P1_gp077_1_FWD	AGATcgtaccttgcggagatgtcaaagaacacG	P1_gp077_1_REV	GAAACgtgttctttgacatctccgcaaggtacg
G8	P1_gp078_1_FWD	AGATgcaccaggattgaggtattttactacggG	P1_gp078_1_REV	GAAACccgtagtaaaatacctcaatcctggtgc
G9	P1_gp079_1_FWD	AGATaccatttctgcccggcgataaagtatggG	P1_gp079_1_REV	GAAACccatactttatcgccgggcagaaatggt
G10	P1_gp080_1_FWD	AGATgtacaatactgacagtttcacttggtgaG	P1_gp080_1_REV	GAAACtcaccaagtgaaactgtcagtattgtac
G11	P1_gp081_1_FWD	AGATatgatcgcattaaccagtcgttccgggaG	P1_gp081_1_REV	GAAACtcccggaacgactggttaatgcgatcat
G12	P1_gp082_1_FWD	AGATataaccttgtgcggatggactggctcaaG	P1_gp082_1_REV	GAAACttgagccagtccatccgcacaaggttat
H1	P1_gp083_1_FWD	AGATcgcccgaagatatacgcagtttcaacacG	P1_gp083_1_REV	GAAACgtgttgaaactgcgtatatcttcgggcg
H2	P1_gp084_1_FWD	AGATttacgttcttcccgatgagcaatatcgcG	P1_gp084_1_REV	GAAACgcgatattgctcatcgggaagaacgtaa
H3	P1_gp085_1_FWD	AGATcagggaagtgtcgttactgcaatgaatcG	P1_gp085_1_REV	GAAACgattcattgcagtaacgacacttccctg
H4	P1_gp086_1_FWD	AGATtccacatgcgaaggcacttgcagcactgG	P1_gp086_1_REV	GAAACcagtgctgcaagtgccttcgcatgtgga
H5	P1_gp087_1_FWD	AGATcagctgagaatgaacataccacccagggG	P1_gp087_1_REV	GAAACccctgggtggtatgttcattctcagctg
H6	P1_gp088_1_FWD	AGATtgccttatacgccggtgatttgtcatggG	P1_gp088_1_REV	GAAACccatgacaaatcaccggcgtataaggca
H7	P1_gp089_1_FWD	AGATacccttgatccatccccagacaatatgcG	P1_gp089_1_REV	GAAACgcatattgtctggggatggatcaagggt
H8	P1_gp090_1_FWD	AGATacccggcgcaggatttactgatatcggtG	P1_gp090_1_REV	GAAACaccgatatcagtaaatcctgcgccgggt
H9	P1_gp091_1_FWD	AGATcctgacagacctgaagtgtttacatgtaG	P1_gp091_1_REV	GAAACtacatgtaaacacttcaggtctgtcagg
H10	P1_gp092_1_FWD	AGATttacgccgaccggcggtatcaggcatgtG	P1_gp092_1_REV	GAAACacatgcctgataccgccggtcggcgtaa
H11	P1_gp093_1_FWD	AGATaaacgccagcaacaggacgcgatcgacgG	P1_gp093_1_REV	GAAACcgtcgatcgcgtcctgttgctggcgttt
H12	P1_gp094_1_FWD	AGATcttccaccacctggcaaaggtgcattaaG	P1_gp094_1_REV	GAAACttaatgcacctttgccaggtggtggaag
Well Position	Name	Sequence	Name	Sequence
A1	P1_gp095_1_FWD	AGATaattgcccatttggtatcgtcggcgatcG	P1_gp095_1_REV	GAAACgatcgccgacgataccaaatgggcaatt
A2	P1_gp096_1_FWD	AGATtcgcgaactggttaaccgcctccacgatG	P1_gp096_1_REV	GAAACatcgtggaggcggttaaccagttcgcga
A3	P1_gp097_1_FWD	AGATtgccgccatcaaggcggctgctaatgaaG	P1_gp097_1_REV	GAAACttcattagcagccgccttgatggcggca
A4	P1_gp099_1_FWD	AGATggaacaacatcagggaacggctaattccG	P1_gp099_1_REV	GAAACggaattagccgttccctgatgttgttcc
A5	P1_gp100_1_FWD	AGATtggataaatcaggaagaaaaaagttgatG	P1_gp100_1_REV	GAAACatcaacttttttcttcctgatttatcca
A6	P1_gp101_1_FWD	AGATatatgtacgattggaatattgcagctaaG	P1_gp101_1_REV	GAAACttagctgcaatattccaatcgtacatat
A7	P1_gp102_1_FWD	AGATttgtctgaatggtggcgcgtgggaccgtG	P1_gp102_1_REV	GAAACacggtcccacgcgccaccattcagacaa
A8	P1_gp103_1_FWD	AGATtcttgatcagcaactaatcaggcatccaG	P1_gp103_1_REV	GAAACtggatgcctgattagttgctgatcaaga
A9	P1_gp104_1_FWD	AGATtgaagtgctcaacaatgttgaagccgggG	P1_gp104_1_REV	GAAACcccggcttcaacattgttgagcacttca
A10	P1_gp105_1_FWD	AGATgaagtctccgccacctacctggtggctaG	P1_gp105_1_REV	GAAACtagccaccaggtaggtggcggagacttc
A11	P1_gp107_1_FWD	AGATacagcgatgaactgtttcgccgtattggG	P1_gp107_1_REV	GAAACccaatacggcgaaacagttcatcgctgt
A12	P1_gp108_1_FWD	AGATtctgcgcttaaaggctatcgctgtgtctG	P1_gp108_1_REV	GAAACagacacagcgatagcctttaagcgcaga
B1	P1_gp109_1_FWD	AGATatcttaaccctaataccgcacgtcgttaG	P1_gp109_1_REV	GAAACtaacgacgtgcggtattagggttaagat
B2	P1_gp110_1_FWD	AGATaaatacataaagagcaattgggctactgG	P1_gp110_1_REV	GAAACcagtagcccaattgctctttatgtattt
B3	P1_gp111_1_FWD	AGATtatcctgtacctaacatccttcgcggtgG	P1_gp111_1_REV	GAAACcaccgcgaaggatgttaggtacaggata
B4	P1_gp112_1_FWD	AGATtctgtagaccccgccgaaaccgacgctgG	P1_gp112_1_REV	GAAACcagcgtcggtttcggcggggtctacaga
B5	P1_gp113_1_FWD	AGATattccaccaaccatcgacgacgttaG	P1_gp113_1_REV	GAAACtaacgtcgtcgatggttggtggaat
Well Position	Name	Sequence	Name	Sequence
	P1vir_insB_2_F	AGATacgtggtgatatggatgacggatggctgG	P1vir_insB_2_R	GAAACcagccatccgtcatccatatcaccacgt
	P1_gp001_2_F	AGATacagttctattagtacaggtgcagggaaG	P1_gp001_2_R	GAAACttccctgcacctgtactaatagaactgt
	P1_gp063_2_F	AGATtgtgtaggatgccagagtttagcagtgaG	P1_gp063_2_R	GAAACtcactgctaaactctggcatcctacaca
	P1_gp096_2_F	AGATggcgacgttattacgccagatcatcataG	P1_gp096_2_R	GAAACtatgatgatctggcgtaataacgtcgcc
	P1_dmt-A-F	AGATctgaaatcgagccttttccatctgccgtG	P1_dmt-A-R	GAAACacggcagatggaaaaggctcgatttcag
